# Supplementary material
Source: publisher figshare collection journal article supplement (https://asha.figshare.com/articles/dataset/_/19945838)
Supplement: Supplementary file 1 [file 1]

**Supplemental Material S2.** Model fit of sequential generalized multilevel regression models of non-stuttering-like disfluencies.

|                              | <i>df</i> | AIC  | BIC  | −2LL  | $\chi^2$ | <i>p</i> |
|------------------------------|-----------|------|------|-------|----------|----------|
| M1: Random Intercept Only    | 3         | 6401 | 6418 | −3197 |          |          |
| M2: Fixed Slope (Condition)  | 5         | 6399 | 6427 | −3195 | 5.63     | .06      |
| M3: Random Slope (Condition) | 10        | 6392 | 6447 | −3186 | 17.61    | .003     |
| M4: Speaker (CWS vs. CWNS)   | 11        | 6386 | 6447 | −3182 | 7.80     | .005     |
| M5: Condition × Speaker      | 13        | 6389 | 6461 | −3181 | 1.26     | .53      |

*Note.* Models were fit using maximum likelihood estimation (Laplace approximation), utilized a negative binomial logarithmic link function, and were based on 1,892 observations (trials) across 47 subjects.  $\chi^2$  and *p* statistics compare the relative model fit of each successive nested model. *df* = degrees of freedom; AIC = Akaike information criterion; BIC = Bayesian information criterion; CWS = children who stutter; CWNS = children who do not stutter.
