# Supplementary material
Source: publisher figshare collection journal article supplement (https://asha.figshare.com/articles/dataset/_/19945838)
Supplement: Supplementary file 2 [file 1]

**Supplemental Material S5.** Results of final models of stuttering-like disfluencies (SLDs; M4) and non-stuttering-like disfluencies (non-SLDs; M4) excluding bilingual participants ( $n = 3$ ).

| SLDs                  |                            |     |                 |          |          | Non-SLDs                   |     |                 |          |          |
|-----------------------|----------------------------|-----|-----------------|----------|----------|----------------------------|-----|-----------------|----------|----------|
| Fixed Effects         | Unstandardized coefficient | SE  | Incidence ratio | <i>t</i> | <i>p</i> | Unstandardized coefficient | SE  | Incidence ratio | <i>t</i> | <i>p</i> |
| Intercept             | −4.94                      | .19 |                 |          |          | −4.00                      | .15 |                 |          |          |
| Condition (baseline1) | 0.18                       | .08 | 1.20            | 2.31     | .02      | 0.14                       | .07 | 1.15            | 2.08     | .04      |
| Condition (baseline2) | −0.12                      | .08 | 0.87            | 1.51     | .13      | −0.08                      | .07 | 0.92            | 1.20     | .23      |
| Speaker (CWS)         | 1.67                       | .28 | 5.31            | 5.96     | < .001   | 0.59                       | .21 | 1.80            | 2.82     | .005     |
| Random Effects        | Var                        | SD  | Correlations    |          |          | Var                        | SD  | Correlations    |          |          |
| Intercept             | .80                        | .89 |                 |          |          | .55                        | .74 |                 |          |          |
| Condition (baseline1) | .10                        | .31 | −.34            |          |          | .07                        | .26 | −.55            |          |          |
| Condition (baseline2) | .08                        | .28 | .08             | .26      |          | .07                        | .26 | .17             | .27      |          |

*Note.* Model for SLDs was fit using maximum likelihood estimation (Laplace approximation), utilized a negative binomial logarithmic link function ( $\theta = 80.81$ ), and was based on 1,770 observations (trials) across 44 subjects. Model for non-SLDs was fit using maximum likelihood estimation (Laplace approximation), utilized a negative binomial logarithmic link function ( $\theta = 8.32$ ), and was based on 1,770 observations (trials) across 44 subjects. CWS = children who stutter.
