# Supplementary material
Source: publisher figshare collection journal article supplement (https://asha.figshare.com/articles/dataset/_/19945838)
Supplement: Supplementary file 3 [file 1]

**Supplemental Material S1.** Model fit of sequential generalized multilevel regression models of stuttering-like disfluencies.

|                              | <i>df</i> | AIC  | BIC  | −2LL  | $\chi^2$ | <i>p</i> |
|------------------------------|-----------|------|------|-------|----------|----------|
| M1: Random Intercept Only    | 3         | 5324 | 5341 | −2659 |          |          |
| M2: Fixed Slope (Condition)  | 5         | 5310 | 5337 | −2645 | 18.65    | < .001   |
| M3: Random Slope (Condition) | 10        | 5302 | 5357 | −2641 | 17.95    | .003     |
| M4: Speaker (CWS vs. CWNS)   | 11        | 5276 | 5337 | −2627 | 27.08    | < .001   |
| M5: Condition × Speaker      | 13        | 5277 | 5349 | −2626 | 3.19     | .20      |

*Note.* Models were fit using maximum likelihood estimation (Laplace approximation), utilized a negative binomial logarithmic link function, and were based on 1,892 observations (trials) across 47 subjects.  $\chi^2$  and *p* statistics compare the relative model fit of each successive nested model. *df* = degrees of freedom; AIC = Akaike information criterion; BIC = Bayesian information criterion; CWS = children who stutter; CWNS = children who do not stutter.
