# Supplementary material
Source: publisher figshare collection journal article supplement (https://asha.figshare.com/articles/dataset/_/19945838)
Supplement: Supplementary file 4 [file 1]

**Supplemental Material S3.** Model fit of sequential generalized multilevel regression models of stuttering-like disfluencies excluding bilingual participants ( $n = 3$ ).

|                                | <i>df</i> | AIC  | BIC  | −2LL  | $\chi^2$ | <i>p</i> |
|--------------------------------|-----------|------|------|-------|----------|----------|
| M1: Random Intercept Only      | 3         | 5012 | 5028 | −2503 |          |          |
| M2: Fixed Slope (Condition)    | 5         | 4997 | 5025 | −2494 | 18.73    | < .001   |
| M3: Random Slope (Condition)   | 10        | 4987 | 5042 | −2483 | 20.50    | .001     |
| M4: Speaker (CWS vs. CWNS)     | 11        | 4963 | 5023 | −2470 | 26.12    | < .001   |
| M5: Condition $\times$ Speaker | 13        | 4963 | 5034 | −2468 | 3.91     | .14      |

*Note.* Models were fit using maximum likelihood estimation (Laplace approximation), utilized a negative binomial logarithmic link function, and were based on 1,770 observations (trials) across 44 subjects.  $\chi^2$  and *p* statistics compare the relative model fit of each successive nested model. *df* = degrees of freedom; AIC = Akaike information criterion; BIC = Bayesian information criterion; CWS = children who stutter; CWNS = children who do not stutter.
